# Supplementary material for: Results of the Brief Jail Mental Health Screen Across Repeated Jail Bookings
Source: Atypon-hosted journal article supplement (doi:10.1176/appi.ps.201800377), 2019-08-05
Supplement: appi.ps.201800377.ds001.pdf [file appi.ps.201800377.ds001.pdf]

TABLE 3. Model estimates with covariates of the extent to which booking number predicted referral for further mental health evaluation overall and by decision rule

| Model<br>Variables                                   | Model Estimates |          |       |          |           |      |           |
|------------------------------------------------------|-----------------|----------|-------|----------|-----------|------|-----------|
|                                                      | -2LL            | Estimate | SE    | <i>t</i> | <i>df</i> | OR   | 95% CI    |
| <b>1. Met criteria for a positive screen overall</b> | 196466.7        |          |       |          |           |      |           |
| Booking Number                                       |                 | 0.019    | 0.006 | 3.35     | 28951     | 1.02 | 1.01-1.03 |
| Age                                                  |                 | 0.015    | 0.002 | 9.76     | 28951     | 1.02 | 1.01-1.02 |
| Sex<br>0 = Men<br>1 = Women                          |                 | -0.959   | 0.045 | -21.08   | 12535     | 0.38 | 0.35-0.42 |
| Race<br>0 = Caucasian<br>1 = Non-Caucasian           |                 | -0.684   | 0.038 | -17.95   | 12535     | 0.50 | 0.47-0.54 |
| Homelessness<br>0 = No<br>1 = Yes                    |                 | 1.024    | 0.048 | 21.50    | 28951     | 2.78 | 2.54-3.06 |
| Substance Use<br>0 = No<br>1 = Yes                   |                 | 0.634    | 0.031 | 20.31    | 28951     | 1.89 | 1.77-2.00 |
| <b>2. Currently taking psychiatric medication</b>    | 212979.2        |          |       |          |           |      |           |
| Booking Number                                       |                 | -0.005   | 0.007 | -0.73    | 29062     | 0.99 | 0.98-1.01 |
| Age                                                  |                 | -0.022   | 0.002 | -11.74   | 29062     | 0.98 | 0.97-0.98 |
| Sex<br>0 = Men<br>1 = Women                          |                 | 1.016    | 0.052 | 19.40    | 12535     | 2.76 | 2.49-3.06 |
| Race<br>0 = Caucasian<br>1 = Non-Caucasian           |                 | 0.768    | 0.046 | 16.80    | 12535     | 2.16 | 1.97-2.36 |

|               |        |       |        |       |      |           |
|---------------|--------|-------|--------|-------|------|-----------|
| Homelessness  |        |       |        |       |      |           |
| 0 = No        | -0.716 | 0.055 | -12.94 | 29062 | 0.49 | 0.44-0.54 |
| 1 = Yes       |        |       |        |       |      |           |
| Substance Use |        |       |        |       |      |           |
| 0 = No        | -0.271 | 0.039 | -6.99  | 29062 | 0.76 | 0.71-0.82 |
| 1 = Yes       |        |       |        |       |      |           |

---

**3. Experienced any prior hospitalization**      219890.8

|                   |        |       |        |       |      |           |
|-------------------|--------|-------|--------|-------|------|-----------|
| Booking Number    | -0.047 | 0.008 | -5.61  | 29048 | 0.95 | 0.94-0.97 |
| Age               | 0.015  | 0.002 | -5.61  | 29048 | 1.01 | 1.01-1.02 |
| Sex               |        |       |        |       |      |           |
| 0 = Men           | -0.810 | 0.055 | -14.61 | 12535 | 0.44 | 0.40-0.50 |
| 1 = Women         |        |       |        |       |      |           |
| Race              |        |       |        |       |      |           |
| 0 = Caucasian     | -0.384 | 0.049 | -7.91  | 12535 | 0.68 | 0.62-0.75 |
| 1 = Non-Caucasian |        |       |        |       |      |           |
| Homelessness      |        |       |        |       |      |           |
| 0 = No            | 1.068  | 0.055 | 19.24  | 29048 | 2.91 | 2.61-3.24 |
| 1 = Yes           |        |       |        |       |      |           |
| Substance Use     |        |       |        |       |      |           |
| 0 = No            | 0.592  | 0.042 | 14.16  | 29048 | 1.81 | 1.67-1.96 |
| 1 = Yes           |        |       |        |       |      |           |

---

**4. 2 or more current psychiatric symptoms**      266416.0

|                |        |       |       |       |      |           |
|----------------|--------|-------|-------|-------|------|-----------|
| Booking Number | -0.068 | 0.014 | -4.71 | 29072 | 0.93 | 0.91-0.96 |
| Age            | 0.010  | 0.003 | 3.39  | 29072 | 1.01 | 1.00-1.02 |
| Sex            |        |       |       |       |      |           |
| 0 = Men        | -0.397 | 0.087 | -4.57 | 12535 | 0.67 | 0.57-0.80 |
| 1 = Women      |        |       |       |       |      |           |

|                   |       |       |       |       |      |           |
|-------------------|-------|-------|-------|-------|------|-----------|
| Race              |       |       |       |       |      |           |
| 0 = Caucasian     | 0.103 | 0.076 | 1.36  | 12535 | 1.11 | 0.96-1.28 |
| 1 = Non-Caucasian |       |       |       |       |      |           |
| Homelessness      |       |       |       |       |      |           |
| 0 = No            | 1.327 | 0.080 | 16.60 | 29072 | 3.77 | 3.22-4.41 |
| 1 = Yes           |       |       |       |       |      |           |
| Substance Use     |       |       |       |       |      |           |
| 0 = No            | 0.866 | 0.071 | 12.17 | 29072 | 2.38 | 2.07-2.73 |
| 1 = Yes           |       |       |       |       |      |           |

---

**5. Referral for any other reason**

224906.4

|                   |        |       |       |       |      |           |
|-------------------|--------|-------|-------|-------|------|-----------|
| Booking Number    | 0.027  | 0.006 | 4.60  | 28951 | 1.03 | 1.02-1.04 |
| Age               | 0.003  | 0.002 | 1.75  | 28951 | 1.00 | 1.00-1.01 |
| Sex               |        |       |       |       |      |           |
| 0 = Men           | -0.345 | 0.051 | -6.74 | 12535 | 0.71 | 0.64-0.78 |
| 1 = Women         |        |       |       |       |      |           |
| Race              |        |       |       |       |      |           |
| 0 = Caucasian     | -0.338 | 0.043 | -7.88 | 12535 | 0.71 | 0.66-0.78 |
| 1 = Non-Caucasian |        |       |       |       |      |           |
| Homelessness      |        |       |       |       |      |           |
| 0 = No            | 0.514  | 0.058 | 8.92  | 28951 | 1.67 | 1.49-1.87 |
| 1 = Yes           |        |       |       |       |      |           |
| Substance Use     |        |       |       |       |      |           |
| 0 = No            | 0.62   | 0.041 | 15.21 | 28951 | 1.86 | 1.72-2.01 |
| 1 = Yes           |        |       |       |       |      |           |

---

*Notes.* -2LL = negative two log likelihood; SE = standard error for the estimate; *t* = *t* value; df = degrees of freedom; OR = odds ratio; 95% CI = 95% confidence interval for the odds ratio.
